# Supplementary material for: Use of Next Generation Sequencing to Define the Origin of Primary Myelofibrosis
Source: MDPI journal article supplement (doi:10.3390/cancers15061785), 2023-03-15

**Supplementary Table S1.** Main clinical characteristics of patients enrolled as validation cohort.

| Patient | Age (years) | BM fibrosis | Splenomegaly | Hb (g/dL) | WBC (x10 <sup>9</sup> /L) | PLTs (x10 <sup>9</sup> /L) |
|---------|-------------|-------------|--------------|-----------|---------------------------|----------------------------|
| FI      | 71          | II          | grade II     | 9.6       | 10.57                     | 126                        |
| PS      | 65          | II          | grade II     | 8.8       | 42                        | 303                        |
| GG      | 75          | II          | grade II     | 9.2       | 4.7                       | 152                        |
| CE      | 58          | I           | grade IV     | 12        | 15                        | 150                        |
| CL      | 70          | II          | grade II     | 9.8       | 5.4                       | 83                         |
| BV      | 81          | I           | grade II     | 12        | 13.5                      | 196                        |
| VM      | 73          | II          | grade IV     | 8.7       | 26                        | 170                        |
| DMFG    | 56          | II          | grade II     | 9.4       | 45                        | 123                        |
| CGD     | 77          | II          | grade IV     | 9.5       | 10.5                      | 398                        |

**Supplementary Table S2.** General statistics for WES analysis

| Sample | # Mate Pairs | % Mapped Reads (on total) | # base pair | Theoretical Coverage | Mean coverage | % of Exome covered at least 1X | % of Exome covered at least 10X | % base >Q30 | Mean quality Score |
|--------|--------------|---------------------------|-------------|----------------------|---------------|--------------------------------|---------------------------------|-------------|--------------------|
| GT_G   | 20.122.276   | 98,36%                    | 4024455200  | 60X                  | 31X           | 87,07%                         | 76,93%                          | 90,97       | 35,58              |
| GT_L   | 15.862.059   | 98,35%                    | 3172411800  | 48X                  | 25X           | 86,94%                         | 73,46%                          | 90,87       | 35,55              |
| GT_S   | 14.407.376   | 97,05%                    | 2881475200  | 43X                  | 24X           | 85,70%                         | 71,17%                          | 91,25       | 35,67              |
| GB_G   | 10.306.336   | 98,11%                    | 2061267200  | 31X                  | 16X           | 86,39%                         | 61,20%                          | 94,37       | 36,64              |
| GB_L   | 8.445.568    | 98,11%                    | 1689113600  | 25X                  | 14X           | 85,93%                         | 52,12%                          | 94,31       | 36,63              |
| GB_S   | 7.025.907    | 96,24%                    | 1405181400  | 21X                  | 12X           | 85,60%                         | 44,17%                          | 94,56       | 36,69              |
| CC_G   | 8.718.111    | 98,26%                    | 1743622200  | 26X                  | 14X           | 86,32%                         | 52,37%                          | 94,08       | 36,53              |
| CC_L   | 7.754.762    | 98,30%                    | 1550952400  | 23X                  | 12X           | 85,94%                         | 46,81%                          | 94,15       | 36,59              |
| CC_S   | 8.619.081    | 97,48%                    | 1723816200  | 26X                  | 14X           | 86,22%                         | 54,18%                          | 94,39       | 36,62              |

G: granulocytes  
L: lymphocytes  
S: saliva

**Supplementary Table S3.** SNVs recorded by WES

| <b>SAMPLES</b> | <b># TOTAL<br/>SNV's called</b> | <b>#<br/>PASSED<br/>FILTER<br/>SNV's</b> | <b>Ti/T<br/>v<br/>ratio</b> | <b>#<br/>SOMATIC<br/>SNV's</b> | <b>#<br/>EXONIC/SPLICING<br/>SNV's*</b> | <b># NON<br/>SYNONIMOUS<br/>SNV's</b> | <b>#<br/>NOVEL<br/>SNV's<br/>*</b> |
|----------------|---------------------------------|------------------------------------------|-----------------------------|--------------------------------|-----------------------------------------|---------------------------------------|------------------------------------|
| GT_G_L         | 415.579                         | 126.369                                  | 1,82                        | 45.969                         | 3.173                                   | 1.540                                 | 80                                 |
| GB_G_L         | 313.077                         | 104.687                                  | 1,86                        | 21.980                         | 1.787                                   | 857                                   | 40                                 |
| CC_G_L         | 282.391                         | 102.479                                  | 1,94                        | 17.077                         | 1.283                                   | 603                                   | 26                                 |

\*NOT IN DBSNP AND  
1000GENOME

Supplementary Table S4. Novel SNVs

| Chr | Start         | End           | Ref | Alt | Func.refGene | Gene.refGene    | Recurrency/case | ExonicFunc.refGene | AAChange.refGene                                      | cosmic64                                    |
|-----|---------------|---------------|-----|-----|--------------|-----------------|-----------------|--------------------|-------------------------------------------------------|---------------------------------------------|
| 5   | 1405545<br>71 | 1405545<br>71 | C   | T   | exonic       | <i>PCDHB7</i>   | 1               | nonsynonymous SNV  | PCDHB7:NM_018940:exon1:c.C2155T:p.P719S               | ID=COSM370895;OCCURENCE=1(lung)             |
| 4   | 1201073<br>11 | 1201073<br>11 | G   | A   | exonic       | <i>MYOZ2</i>    | 1               | nonsynonymous SNV  | MYOZ2:NM_016599:exon6:c.G751A:p.E251K                 | ID=COSM202461;OCCURENCE=2(large_intestine)  |
| 2   | 2022524<br>70 | 2022524<br>70 | C   | T   | exonic       | <i>TRAK2</i>    | 1               | nonsynonymous SNV  | TRAK2:NM_015049:exon13:c.G1652A:p.R551Q               | ID=COSM170962;OCCURENCE=1(large_intestine)  |
| 5   | 9485266<br>6  | 9485266<br>6  | C   | T   | exonic       | <i>TTC37</i>    | 1               | nonsynonymous SNV  | TTC37:NM_014639:exon22:c.G2390A:p.G797D               | ID=COSM1230789;OCCURENCE=1(large_intestine) |
| 3   | 1955120<br>42 | 1955120<br>42 | T   | C   | exonic       | <i>MUC4</i>     | 2               | nonsynonymous SNV  | MUC4:NM_018406:exon2:c.A6409G:p.T2137A                |                                             |
| 3   | 1955120<br>42 | 1955120<br>42 | T   | C   | exonic       | <i>MUC4</i>     | 2               | nonsynonymous SNV  | MUC4:NM_018406:exon2:c.A6409G:p.T2137A                |                                             |
| 2   | 2196028<br>30 | 2196028<br>30 | G   | A   | exonic       | <i>TTLL4</i>    | 2               | nonsynonymous SNV  | TTLL4:NM_014640:exon3:c.G431A:p.S144N                 |                                             |
| 2   | 2196028<br>30 | 2196028<br>30 | G   | A   | exonic       | <i>TTLL4</i>    | 2               | nonsynonymous SNV  | TTLL4:NM_014640:exon3:c.G431A:p.S144N                 |                                             |
| 20  | 3739622<br>0  | 3739622<br>0  | C   | G   | exonic       | <i>ACTR5</i>    | 1               | nonsynonymous SNV  | ACTR5:NM_024855:exon8:c.C1547G:p.P516R                |                                             |
| 5   | 1289835<br>36 | 1289835<br>36 | T   | C   | exonic       | <i>ADAMTS19</i> | 1               | nonsynonymous SNV  | ADAMTS19:NM_133638:exon12:c.T1933C:p.C645R            |                                             |
| 15  | 8916989<br>1  | 8916989<br>1  | A   | T   | exonic       | <i>AEN</i>      | 1               | nonsynonymous SNV  | AEN:NM_022767:exon2:c.A451T:p.M151L                   |                                             |
| 16  | 5643692<br>2  | 5643692<br>2  | G   | A   | exonic       | <i>AMFR</i>     | 1               | nonsynonymous SNV  | AMFR:NM_001144:exon7:c.C949T:p.R317C                  |                                             |
| 11  | 5700434<br>8  | 5700434<br>8  | G   | A   | exonic       | <i>APLNR</i>    | 1               | nonsynonymous SNV  | APLNR:NM_005161:exon1:c.C131T:p.T44M                  |                                             |
| 3   | 1538402<br>24 | 1538402<br>24 | G   | C   | exonic       | <i>ARHGEF26</i> | 1               | nonsynonymous SNV  | ARHGEF26:NM_001251962:exon2:c.G443C:p.R148P,ARHGEF26: |                                             |

|    |               |               |   |   |        |           |   |                   |                                                                                                                                                                         |  |
|----|---------------|---------------|---|---|--------|-----------|---|-------------------|-------------------------------------------------------------------------------------------------------------------------------------------------------------------------|--|
|    |               |               |   |   |        |           |   |                   | NM_001251963:exon2:c.G443C:p.R148P,ARHGEF26:NM_015595:exon2:c.G443C:p.R148P                                                                                             |  |
| 2  | 3918517<br>7  | 3918517<br>7  | C | T | exonic | ARHGEF33  | 1 | nonsynonymous SNV | ARHGEF33:NM_001145451:exon13:c.C1373T:p.S458L                                                                                                                           |  |
| X  | 1553939       | 1553939       | C | T | exonic | ASMTL     | 1 | nonsynonymous SNV | ASMTL:NM_001173474:exon4:c.G328A:p.A110T,ASMTL:NM_001173473:exon5:c.G202A:p.A68T,ASMTL:NM_004192:exon5:c.G376A:p.A126T                                                  |  |
| 3  | 1941677<br>12 | 1941677<br>12 | T | C | exonic | ATP13A3   | 1 | nonsynonymous SNV | ATP13A3:NM_024524:exon13:c.A1441G:p.I481V                                                                                                                               |  |
| 16 | 2884748<br>5  | 2884748<br>5  | G | A | exonic | ATXN2L    | 1 | nonsynonymous SNV | ATXN2L:NM_007245:exon22:c.G3127A:p.D1043N,ATXN2L:NM_017492:exon22:c.G3127A:p.D1043N,ATXN2L:NM_145714:exon22:c.G3127A:p.D1043N,ATXN2L:NM_148414:exon22:c.G3127A:p.D1043N |  |
| 10 | 1240506<br>80 | 1240506<br>80 | C | A | exonic | BTBD16    | 1 | nonsynonymous SNV | BTBD16:NM_144587:exon7:c.C561A:p.H187Q                                                                                                                                  |  |
| 10 | 1240506<br>06 | 1240506<br>06 | G | T | exonic | BTBD16    | 1 | nonsynonymous SNV | BTBD16:NM_144587:exon7:c.G487T:p.A163S                                                                                                                                  |  |
| 14 | 5995065<br>0  | 5995065<br>0  | G | C | exonic | C14orf149 | 1 | nonsynonymous SNV | C14orf149:NM_144581:exon1:c.C385G:p.R129G                                                                                                                               |  |
| 15 | 4067515<br>8  | 4067515<br>8  | C | T | exonic | C15orf23  | 1 | nonsynonymous SNV | C15orf23:NM_001142761:exon1:c.C122T:p.A41V,C15orf23:NM_001142762:exon1:c.C122T:p.A41V,C15orf23:NM_033286:exon1:c.C122T:p.A41V                                           |  |
| 19 | 757886        | 757886        | C | T | exonic | C19orf21  | 1 | nonsynonymous SNV | C19orf21:NM_173481:exon2:c.C940T:p.R314W                                                                                                                                |  |
| 19 | 1010785       | 1010785       | G | A | exonic | C19orf6   | 1 | nonsynonymous SNV | C19orf6:NM_001033026:exon11:c.C1427T:p.T476M                                                                                                                            |  |
| 21 | 4758194<br>6  | 4758194<br>6  | G | C | exonic | C21orf56  | 1 | nonsynonymous SNV | C21orf56:NM_032261:exon3:c.C118G:p.R40G,C21orf56:NM_001142854:exon4:c.C580G:p.R194G                                                                                     |  |
| 2  | 2780440<br>3  | 2780440<br>3  | G | A | exonic | C2orf16   | 1 | nonsynonymous SNV | C2orf16:NM_032266:exon1:c.G4964A:p.R1655H                                                                                                                               |  |

|    |               |               |   |   |        |                |   |                   |                                                                                                                                                                                                |
|----|---------------|---------------|---|---|--------|----------------|---|-------------------|------------------------------------------------------------------------------------------------------------------------------------------------------------------------------------------------|
| 5  | 1734163<br>34 | 1734163<br>34 | C | T | exonic | <i>C5orf47</i> | 1 | nonsynonymous SNV | C5orf47:NM_001144954:exon1:c.<br>C68T:p.S23L                                                                                                                                                   |
| 17 | 4883619       | 4883619       | T | C | exonic | <i>CAMTA2</i>  | 1 | nonsynonymous SNV | CAMTA2:NM_001171166:exon8:<br>c.A1004G:p.Q335R,CAMTA2:NM<br>_001171168:exon8:c.A995G:p.Q3<br>32R,CAMTA2:NM_001171167:ex<br>on9:c.A1067G:p.Q356R,CAMTA2<br>:NM_015099:exon9:c.A998G:p.Q<br>333R |
| 12 | 7526150       | 7526150       | T | C | exonic | <i>CD163L1</i> | 1 | nonsynonymous SNV | CD163L1:NM_174941:exon14:c.<br>A3496G:p.S1166G                                                                                                                                                 |
| 22 | 1760134<br>4  | 1760134<br>4  | A | G | exonic | <i>CECR6</i>   | 1 | nonsynonymous SNV | CECR6:NM_031890:exon1:c.T67<br>4C:p.L225P                                                                                                                                                      |
| 22 | 4693113<br>7  | 4693113<br>7  | T | G | exonic | <i>CELSR1</i>  | 1 | nonsynonymous SNV | CELSR1:NM_014246:exon1:c.A1<br>931C:p.E644A                                                                                                                                                    |
| 16 | 6699776<br>8  | 6699776<br>8  | G | T | exonic | <i>CES3</i>    | 1 | nonsynonymous SNV | CES3:NM_001185177:exon4:c.G<br>490T:p.A164S,CES3:NM_024922<br>:exon4:c.G490T:p.A164S                                                                                                           |
| 2  | 1898750<br>78 | 1898750<br>78 | A | G | exonic | <i>COL3A1</i>  | 1 | nonsynonymous SNV | COL3A1:NM_000090:exon49:c.A<br>3998G:p.D1333G                                                                                                                                                  |
| 10 | 9968314<br>0  | 9968314<br>0  | C | T | exonic | <i>CRTAC1</i>  | 1 | nonsynonymous SNV | CRTAC1:NM_001206528:exon4:c<br>.G439A:p.D147N,CRTAC1:NM_0<br>18058:exon4:c.G439A:p.D147N                                                                                                       |
| 10 | 1694270<br>8  | 1694270<br>8  | A | G | exonic | <i>CUBN</i>    | 1 | nonsynonymous SNV | CUBN:NM_001081:exon53:c.T83<br>26C:p.S2776P                                                                                                                                                    |
| 14 | 2458908<br>5  | 2458908<br>5  | A | C | exonic | <i>DCAF11</i>  | 1 | nonsynonymous SNV | DCAF11:NM_001163484:exon11:<br>c.A1072C:p.I358L,DCAF11:NM_0<br>25230:exon11:c.A1072C:p.I358L,<br>DCAF11:NM_181357:exon11:c.A<br>994C:p.I332L                                                   |
| 12 | 1326258<br>56 | 1326258<br>56 | A | G | exonic | <i>DDX51</i>   | 1 | nonsynonymous SNV | DDX51:NM_175066:exon8:c.T12<br>14C:p.L405P                                                                                                                                                     |
| 9  | 1264336<br>16 | 1264336<br>16 | T | C | exonic | <i>DENND1A</i> | 1 | nonsynonymous SNV | DENND1A:NM_020946:exon7:c.<br>A407G:p.H136R,DENND1A:NM_<br>024820:exon7:c.A407G:p.H136R                                                                                                        |
| 1  | 1539153<br>73 | 1539153<br>73 | C | T | exonic | <i>DENND4B</i> | 1 | nonsynonymous SNV | DENND4B:NM_014856:exon3:c.<br>G551A:p.R184H                                                                                                                                                    |
| 8  | 1455417<br>70 | 1455417<br>70 | G | T | exonic | <i>DGAT1</i>   | 1 | nonsynonymous SNV | DGAT1:NM_012079:exon8:c.C73<br>9A:p.L247M                                                                                                                                                      |

|    |               |               |   |   |        |                |   |                   |                                                                                                                                                                                                                                                       |  |
|----|---------------|---------------|---|---|--------|----------------|---|-------------------|-------------------------------------------------------------------------------------------------------------------------------------------------------------------------------------------------------------------------------------------------------|--|
| 8  | 1295720<br>6  | 1295720<br>6  | G | T | exonic | <i>DLC1</i>    | 1 | nonsynonymous SNV | DLC1:NM_001164271:exon5:c.C1107A:p.D369E,DLC1:NM_006094:exon5:c.C1329A:p.D443E,DLC1:NM_182643:exon9:c.C2640A:p.D880E                                                                                                                                  |  |
| 3  | 5745729<br>7  | 5745729<br>7  | G | C | exonic | <i>DNAH12</i>  | 1 | nonsynonymous SNV | DNAH12:NM_178504:exon15:c.C1813G:p.L605V                                                                                                                                                                                                              |  |
| 6  | 5636593<br>2  | 5636593<br>2  | C | A | exonic | <i>DST</i>     | 1 | nonsynonymous SNV | DST:NM_015548:exon61:c.G11973T:p.Q3991H                                                                                                                                                                                                               |  |
| 1  | 1670954<br>44 | 1670954<br>44 | G | A | exonic | <i>DUSP27</i>  | 1 | nonsynonymous SNV | DUSP27:NM_001080426:exon5:c.G1076A:p.G359D                                                                                                                                                                                                            |  |
| 20 | 2730050       | 2730050       | G | A | exonic | <i>EBF4</i>    | 1 | nonsynonymous SNV | EBF4:NM_001110514:exon9:c.G631A:p.V211M                                                                                                                                                                                                               |  |
| 2  | 2122516<br>46 | 2122516<br>46 | T | C | exonic | <i>ERBB4</i>   | 1 | nonsynonymous SNV | ERBB4:NM_001042599:exon26:c.A3365G:p.E1122G,ERBB4:NM_005235:exon27:c.A3413G:p.E1138G                                                                                                                                                                  |  |
| 11 | 1246266<br>02 | 1246266<br>02 | G | A | exonic | <i>ESAM</i>    | 1 | nonsynonymous SNV | ESAM:NM_138961:exon3:c.C286T:p.P96S                                                                                                                                                                                                                   |  |
| 16 | 6826518<br>0  | 6826518<br>0  | C | T | exonic | <i>ESRP2</i>   | 1 | nonsynonymous SNV | ESRP2:NM_024939:exon12:c.G1612A:p.V538M                                                                                                                                                                                                               |  |
| 1  | 3271399<br>7  | 3271399<br>7  | A | G | exonic | <i>FAM167B</i> | 1 | nonsynonymous SNV | FAM167B:NM_032648:exon2:c.A287G:p.Q96R                                                                                                                                                                                                                |  |
| 7  | 208930        | 208930        | A | G | exonic | <i>FAM20C</i>  | 1 | nonsynonymous SNV | FAM20C:NM_020223:exon3:c.A817G:p.I273V                                                                                                                                                                                                                |  |
| 22 | 2498223<br>1  | 2498223<br>1  | C | G | exonic | <i>FAM211B</i> | 1 | nonsynonymous SNV | FAM211B:NM_207644:exon4:c.G571C:p.G191R                                                                                                                                                                                                               |  |
| 1  | 1173383<br>1  | 1173383<br>1  | G | A | exonic | <i>FBXO6</i>   | 1 | nonsynonymous SNV | FBXO6:NM_018438:exon6:c.G805A:p.E269K                                                                                                                                                                                                                 |  |
| 12 | 4554391       | 4554391       | T | C | exonic | <i>FGF6</i>    | 1 | nonsynonymous SNV | FGF6:NM_020996:exon1:c.A346G:p.S116G                                                                                                                                                                                                                  |  |
| 10 | 1232633<br>68 | 1232633<br>68 | T | C | exonic | <i>FGFR2</i>   | 1 | nonsynonymous SNV | FGFR2:NM_001144914:exon7:c.A1039G:p.M347V,FGFR2:NM_001144916:exon7:c.A1030G:p.M344V,FGFR2:NM_001144917:exon8:c.A1027G:p.M343V,FGFR2:NM_001144918:exon8:c.A1024G:p.M342V,FGFR2:NM_001144913:exon9:c.A1378G:p.M460V,FGFR2:NM_001144915:exon9:c.A1108G:p |  |

|    |               |               |   |   |        |                 |   |                   |                                                                                                                                  |  |
|----|---------------|---------------|---|---|--------|-----------------|---|-------------------|----------------------------------------------------------------------------------------------------------------------------------|--|
|    |               |               |   |   |        |                 |   |                   | .M370V,FGFR2:NM_001144919:exon9:c.A1111G:p.M371V,FGFR2:NM_000141:exon10:c.A1375G:p.M459V,FGFR2:NM_022970:exon10:c.A1378G:p.M460V |  |
| 17 | 7413345<br>1  | 7413345<br>1  | C | T | exonic | <i>FOXJ1</i>    | 1 | nonsynonymous SNV | FOXJ1:NM_001454:exon3:c.G1249A:p.V417M                                                                                           |  |
| 4  | 4863637<br>3  | 4863637<br>3  | T | G | exonic | <i>FRYL</i>     | 1 | nonsynonymous SNV | FRYL:NM_015030:exon4:c.A55C:p.S19R                                                                                               |  |
| 6  | 5299334<br>4  | 5299334<br>4  | G | A | exonic | <i>GCM1</i>     | 1 | nonsynonymous SNV | GCM1:NM_003643:exon6:c.C971T:p.P324L                                                                                             |  |
| 1  | 2283466<br>99 | 2283466<br>99 | C | G | exonic | <i>GJC2</i>     | 1 | nonsynonymous SNV | GJC2:NM_020435:exon2:c.C1240G:p.R414G                                                                                            |  |
| 16 | 4385106       | 4385106       | A | G | exonic | <i>GLIS2</i>    | 1 | nonsynonymous SNV | GLIS2:NM_032575:exon4:c.A568G:p.N190D                                                                                            |  |
| 12 | 1109064<br>19 | 1109064<br>19 | G | T | exonic | <i>GPN3</i>     | 1 | nonsynonymous SNV | GPN3:NM_001164372:exon1:c.C23A:p.A8D                                                                                             |  |
| 12 | 6934685       | 6934685       | C | T | exonic | <i>GPR162</i>   | 1 | nonsynonymous SNV | GPR162:NM_014449:exon3:c.C52T:p.P18S,GPR162:NM_019858:exon3:c.C904T:p.P302S                                                      |  |
| 7  | 7392983<br>0  | 7392983<br>0  | G | A | exonic | <i>GTF2IRD1</i> | 1 | nonsynonymous SNV | GTF2IRD1:NM_001199207:exon4:c.G421A:p.G141S,GTF2IRD1:NM_005685:exon4:c.G325A:p.G109S,GTF2IRD1:NM_016328:exon4:c.G325A:p.G109S    |  |
| 8  | 1452233<br>39 | 1452233<br>39 | A | G | exonic | <i>HEATR7A</i>  | 1 | nonsynonymous SNV | HEATR7A:NM_001099281:exon3:c.A164G:p.D55G,HEATR7A:NM_001099280:exon4:c.A164G:p.D55G,HEATR7A:NM_032450:exon4:c.A164G:p.D55G       |  |
| 19 | 5577726<br>3  | 5577726<br>3  | G | A | exonic | <i>HSPBP1</i>   | 1 | nonsynonymous SNV | HSPBP1:NM_012267:exon6:c.C884T:p.A295V,HSPBP1:NM_001130106:exon7:c.C884T:p.A295V                                                 |  |
| 16 | 7088381<br>8  | 7088381<br>8  | G | T | exonic | <i>HYDIN</i>    | 1 | nonsynonymous SNV | HYDIN:NM_032821:exon75:c.C12681A:p.F4227L                                                                                        |  |
| 8  | 3977564<br>2  | 3977564<br>2  | C | G | exonic | <i>IDO1</i>     | 1 | nonsynonymous SNV | IDO1:NM_002164:exon3:c.C219G:p.H73Q                                                                                              |  |
| 1  | 1589864<br>08 | 1589864<br>08 | G | C | exonic | <i>IFI16</i>    | 1 | nonsynonymous SNV | IFI16:NM_005531:exon4:c.G467C:p.G156A                                                                                            |  |

|    |               |               |   |   |        |                  |   |                   |                                                                                                                   |  |
|----|---------------|---------------|---|---|--------|------------------|---|-------------------|-------------------------------------------------------------------------------------------------------------------|--|
| 2  | 2769512<br>8  | 2769512<br>8  | G | A | exonic | <i>IFT172</i>    | 1 | nonsynonymous SNV | IFT172:NM_015662:exon15:c.C1513T;p.R505W                                                                          |  |
| 15 | 6562709<br>2  | 6562709<br>2  | C | T | exonic | <i>IGDCC3</i>    | 1 | nonsynonymous SNV | IGDCC3:NM_004884:exon5:c.G797A;p.R266H                                                                            |  |
| 16 | 8772383<br>0  | 8772383<br>0  | G | A | exonic | <i>JPH3</i>      | 1 | nonsynonymous SNV | JPH3:NM_020655:exon4:c.G1864A;p.E622K                                                                             |  |
| 14 | 8872973<br>7  | 8872973<br>7  | C | T | exonic | <i>KCNK10</i>    | 1 | nonsynonymous SNV | KCNK10:NM_021161:exon2:c.G196A;p.V66I,KCNK10:NM_138317:exon2:c.G211A;p.V71I,KCNK10:NM_138318:exon2:c.G211A;p.V71I |  |
| 14 | 1053599<br>81 | 1053599<br>81 | C | T | exonic | <i>KIAA0284</i>  | 1 | nonsynonymous SNV | KIAA0284:NM_015005:exon14:c.C4055T;p.T1352M,KIAA0284:NM_001112726:exon15:c.C4160T;p.T1387M                        |  |
| 6  | 1386575<br>95 | 1386575<br>95 | T | G | exonic | <i>KIAA1244</i>  | 1 | nonsynonymous SNV | KIAA1244:NM_020340:exon34:c.T6506G;p.V2169G                                                                       |  |
| 20 | 6088971<br>5  | 6088971<br>5  | C | T | exonic | <i>LAMA5</i>     | 1 | nonsynonymous SNV | LAMA5:NM_005560:exon61:c.G8263A;p.D2755N                                                                          |  |
| 4  | 1827316       | 1827316       | T | C | exonic | <i>LETM1</i>     | 1 | nonsynonymous SNV | LETM1:NM_012318:exon7:c.A1175G;p.D392G                                                                            |  |
| 15 | 1015237<br>54 | 1015237<br>54 | G | A | exonic | <i>LRRK1</i>     | 1 | nonsynonymous SNV | LRRK1:NM_024652:exon4:c.G283A;p.A95T                                                                              |  |
| 11 | 6393339<br>0  | 6393339<br>0  | G | A | exonic | <i>MACROD1</i>   | 1 | nonsynonymous SNV | MACROD1:NM_014067:exon1:c.C77T;p.P26L                                                                             |  |
| 6  | 1192528<br>77 | 1192528<br>77 | A | C | exonic | <i>MCM9</i>      | 1 | nonsynonymous SNV | MCM9:NM_017696:exon1:c.T12G;p.D4E,MCM9:NM_153255:exon2:c.T12G;p.D4E                                               |  |
| 19 | 5032162<br>1  | 5032162<br>1  | C | A | exonic | <i>MED25</i>     | 1 | nonsynonymous SNV | MED25:NM_030973:exon1:c.C23A;p.P8Q                                                                                |  |
| 19 | 3622431<br>6  | 3622431<br>6  | C | T | exonic | <i>MLL4</i>      | 1 | nonsynonymous SNV | MLL4:NM_014727:exon28:c.C6866T;p.P2289L                                                                           |  |
| 20 | 4957589<br>9  | 4957589<br>9  | G | T | exonic | <i>MOCS3</i>     | 1 | nonsynonymous SNV | MOCS3:NM_014484:exon1:c.G520T;p.D174Y                                                                             |  |
| 2  | 7136066<br>6  | 7136066<br>6  | A | T | exonic | <i>MPHOSPH10</i> | 1 | nonsynonymous SNV | MPHOSPH10:NM_005791:exon2:c.A728T;p.D243V                                                                         |  |
| 10 | 2840914<br>7  | 2840914<br>7  | A | C | exonic | <i>MPP7</i>      | 1 | nonsynonymous SNV | MPP7:NM_173496:exon12:c.T863G;p.I288S                                                                             |  |
| 22 | 3040951<br>7  | 3040951<br>7  | A | G | exonic | <i>MTMR3</i>     | 1 | nonsynonymous SNV | MTMR3:NM_021090:exon14:c.A1490G;p.N497S,MTMR3:NM_1530                                                             |  |

|    |               |               |   |   |        |               |   |                   |                                                                                                                                                                                      |  |
|----|---------------|---------------|---|---|--------|---------------|---|-------------------|--------------------------------------------------------------------------------------------------------------------------------------------------------------------------------------|--|
|    |               |               |   |   |        |               |   |                   | 50:exon14:c.A1490G:p.N497S,M<br>TMR3:NM_153051:exon14:c.A14<br>90G:p.N497S                                                                                                           |  |
| 7  | 1006921<br>68 | 1006921<br>68 | C | T | exonic | <i>MUC17</i>  | 1 | nonsynonymous SNV | MUC17:NM_001040105:exon5:c.<br>C12578T:p.T4193I                                                                                                                                      |  |
| 10 | 2644367<br>8  | 2644367<br>8  | G | A | exonic | <i>MYO3A</i>  | 1 | nonsynonymous SNV | MYO3A:NM_017433:exon25:c.G2<br>719A:p.D907N                                                                                                                                          |  |
| 10 | 5158661<br>9  | 5158661<br>9  | A | G | exonic | <i>NCOA4</i>  | 1 | nonsynonymous SNV | NCOA4:NM_001145260:exon11:c<br>.A1897G:p.K633E                                                                                                                                       |  |
| 8  | 2481374<br>4  | 2481374<br>4  | C | T | exonic | <i>NEFL</i>   | 1 | nonsynonymous SNV | NEFL:NM_006158:exon1:c.G286<br>A:p.D96N                                                                                                                                              |  |
| 11 | 284304        | 284304        | C | T | exonic | <i>NLRP6</i>  | 1 | nonsynonymous SNV | NLRP6:NM_138329:exon6:c.C22<br>76T:p.T759M                                                                                                                                           |  |
| 1  | 1190724<br>4  | 1190724<br>4  | G | A | exonic | <i>NPPA</i>   | 1 | nonsynonymous SNV | NPPA:NM_006172:exon2:c.C376<br>T:p.R126W                                                                                                                                             |  |
| 2  | 2765654<br>6  | 2765654<br>6  | C | G | exonic | <i>NRBP1</i>  | 1 | nonsynonymous SNV | NRBP1:NM_013392:exon3:c.C21<br>7G:p.Q73E                                                                                                                                             |  |
| 12 | 2944085       | 2944085       | G | A | exonic | <i>NRIP2</i>  | 1 | nonsynonymous SNV | NRIP2:NM_031474:exon1:c.C65T<br>:p.T22M                                                                                                                                              |  |
| 1  | 2285663<br>24 | 2285663<br>24 | G | T | exonic | <i>OBSCN</i>  | 1 | nonsynonymous SNV | OBSCN:NM_001098623:exon105<br>:c.G23735T:p.R7912L                                                                                                                                    |  |
| 1  | 2284025<br>83 | 2284025<br>83 | C | A | exonic | <i>OBSCN</i>  | 1 | nonsynonymous SNV | OBSCN:NM_001098623:exon5:c.<br>C1612A:p.H538N,OBSCN:NM_05<br>2843:exon5:c.C1612A:p.H538N                                                                                             |  |
| 13 | 5361731<br>0  | 5361731<br>0  | G | A | exonic | <i>OLFM4</i>  | 1 | nonsynonymous SNV | OLFM4:NM_006418:exon4:c.G64<br>1A:p.R214Q                                                                                                                                            |  |
| 11 | 6221100       | 6221100       | T | C | exonic | <i>OR52W1</i> | 1 | nonsynonymous SNV | OR52W1:NM_001005178:exon1:<br>c.T647C:p.I216T                                                                                                                                        |  |
| 8  | 1077260<br>58 | 1077260<br>58 | C | G | exonic | <i>OXR1</i>   | 1 | nonsynonymous SNV | OXR1:NM_181354:exon9:c.C178<br>0G:p.H594D,OXR1:NM_0011985<br>32:exon10:c.C1804G:p.H602D,O<br>XR1:NM_001198533:exon11:c.C<br>1801G:p.H601D,OXR1:NM_0180<br>02:exon11:c.C1801G:p.H601D |  |
| 11 | 7405362<br>0  | 7405362<br>0  | C | G | exonic | <i>PGM2L1</i> | 1 | nonsynonymous SNV | PGM2L1:NM_173582:exon12:c.G<br>1518C:p.R506S                                                                                                                                         |  |
| 3  | 1705625<br>1  | 1705625<br>1  | C | G | exonic | <i>PLCL2</i>  | 1 | nonsynonymous SNV | PLCL2:NM_015184:exon3:c.C24<br>88G:p.L830V                                                                                                                                           |  |
| 22 | 5071416<br>5  | 5071416<br>5  | C | T | exonic | <i>PLXNB2</i> | 1 | nonsynonymous SNV | PLXNB2:NM_012401:exon37:c.G<br>5485A:p.A1829T                                                                                                                                        |  |

|    |               |               |   |   |        |                |   |                   |                                                                                                                                                                              |  |
|----|---------------|---------------|---|---|--------|----------------|---|-------------------|------------------------------------------------------------------------------------------------------------------------------------------------------------------------------|--|
| 19 | 4325859<br>8  | 4325859<br>8  | T | G | exonic | <i>PSG8</i>    | 1 | nonsynonymous SNV | PSG8:NM_001130168:exon4:c.A764C:p.Q255P,PSG8:NM_001130167:exon5:c.A1130C:p.Q377P,PSG8:NM_182707:exon5:c.A1130C:p.Q377P                                                       |  |
| 20 | 4812972<br>6  | 4812972<br>6  | G | A | exonic | <i>PTGIS</i>   | 1 | nonsynonymous SNV | PTGIS:NM_000961:exon8:c.C1097T:p.A366V                                                                                                                                       |  |
| 1  | 8421196       | 8421196       | G | A | exonic | <i>RERE</i>    | 1 | nonsynonymous SNV | RERE:NM_001042682:exon8:c.C709T:p.P237S,RERE:NM_001042681:exon18:c.C2371T:p.P791S,RERE:NM_012102:exon19:c.C2371T:p.P791S                                                     |  |
| 1  | 1143545<br>75 | 1143545<br>75 | C | A | exonic | <i>RSBN1</i>   | 1 | nonsynonymous SNV | RSBN1:NM_018364:exon1:c.G460T:p.A154S                                                                                                                                        |  |
| 21 | 4389602<br>5  | 4389602<br>5  | C | T | exonic | <i>RSPH1</i>   | 1 | nonsynonymous SNV | RSPH1:NM_080860:exon8:c.G860A:p.R287H                                                                                                                                        |  |
| 9  | 1392985<br>97 | 1392985<br>97 | T | G | exonic | <i>SDCCAG3</i> | 1 | nonsynonymous SNV | SDCCAG3:NM_001039708:exon7:c.A899C:p.Q300P,SDCCAG3:NM_006643:exon8:c.A1049C:p.Q350P,SDCCAG3:NM_001039707:exon9:c.A1118C:p.Q373P                                              |  |
| 22 | 3089137<br>2  | 3089137<br>2  | C | T | exonic | <i>SEC14L4</i> | 1 | nonsynonymous SNV | SEC14L4:NM_001161368:exon5:c.G292A:p.V98M,SEC14L4:NM_174977:exon5:c.G292A:p.V98M                                                                                             |  |
| 9  | 1393589<br>54 | 1393589<br>54 | C | A | exonic | <i>SEC16A</i>  | 1 | nonsynonymous SNV | SEC16A:NM_014866:exon9:c.G4364T:p.G1455V                                                                                                                                     |  |
| 1  | 1561466<br>34 | 1561466<br>34 | G | A | exonic | <i>SEMA4A</i>  | 1 | nonsynonymous SNV | SEMA4A:NM_001193302:exon13:c.G1736A:p.R579Q,SEMA4A:NM_001193300:exon15:c.G2132A:p.R711Q,SEMA4A:NM_001193301:exon15:c.G2132A:p.R711Q,SEMA4A:NM_022367:exon15:c.G2132A:p.R711Q |  |
| 15 | 4806389<br>7  | 4806389<br>7  | C | T | exonic | <i>SEMA6D</i>  | 1 | nonsynonymous SNV | SEMA6D:NM_020858:exon17:c.C2951T:p.P984L,SEMA6D:NM_153616:exon17:c.C2912T:p.P971L,SEMA6D:NM_153617:exon18:c.C2969T:p.P990L,SEMA6D:NM_153618:exon19:c.C3137T:p.P1046L         |  |

|    |               |               |   |   |        |          |   |                   |                                                                                                                                                                                                      |  |
|----|---------------|---------------|---|---|--------|----------|---|-------------------|------------------------------------------------------------------------------------------------------------------------------------------------------------------------------------------------------|--|
|    |               |               |   |   |        |          |   |                   | ,SEMA6D:NM_001198999:exon2<br>0:c.C2951T:p.P984L                                                                                                                                                     |  |
| 4  | 8230069       | 8230069       | C | A | exonic | SH3TC1   | 1 | nonsynonymous SNV | SH3TC1:NM_018986:exon12:c.C<br>2648A:p.A883D                                                                                                                                                         |  |
| 1  | 1606166<br>66 | 1606166<br>66 | C | T | exonic | SLAMF1   | 1 | nonsynonymous SNV | SLAMF1:NM_003037:exon1:c.G7<br>0A:p.G24R                                                                                                                                                             |  |
| 8  | 8260605<br>4  | 8260605<br>4  | T | C | exonic | SLC10A5  | 1 | nonsynonymous SNV | SLC10A5:NM_001010893:exon1:<br>c.A1154G:p.Q385R                                                                                                                                                      |  |
| 15 | 8547870<br>5  | 8547870<br>5  | G | A | exonic | SLC28A1  | 1 | nonsynonymous SNV | SLC28A1:NM_004213:exon15:c.<br>G1537A:p.A513T                                                                                                                                                        |  |
| 8  | 2227345<br>0  | 2227345<br>0  | G | A | exonic | SLC39A14 | 1 | nonsynonymous SNV | SLC39A14:NM_001128431:exon<br>6:c.G919A:p.V307M,SLC39A14:N<br>M_001135153:exon6:c.G919A:p.<br>V307M,SLC39A14:NM_00113515<br>4:exon6:c.G919A:p.V307M,SLC3<br>9A14:NM_015359:exon6:c.G919<br>A:p.V307M |  |
| 12 | 346452        | 346452        | G | A | exonic | SLC6A13  | 1 | nonsynonymous SNV | SLC6A13:NM_001190997:exon4:<br>c.C292T:p.R98W,SLC6A13:NM_0<br>16615:exon6:c.C568T:p.R190W                                                                                                            |  |
| 17 | 1687713       | 1687713       | A | T | exonic | SMYD4    | 1 | nonsynonymous SNV | SMYD4:NM_052928:exon8:c.T19<br>27A:p.S643T                                                                                                                                                           |  |
| 4  | 5292703<br>5  | 5292703<br>5  | C | G | exonic | SPATA18  | 1 | nonsynonymous SNV | SPATA18:NM_145263:exon3:c.C<br>281G:p.S94C                                                                                                                                                           |  |
| 15 | 9176981<br>0  | 9176981<br>0  | G | A | exonic | SV2B     | 1 | nonsynonymous SNV | SV2B:NM_014848:exon3:c.G317<br>A:p.R106H                                                                                                                                                             |  |
| 16 | 2999883<br>1  | 2999883<br>1  | G | C | exonic | TAOK2    | 1 | nonsynonymous SNV | TAOK2:NM_016151:exon16:c.G3<br>238C:p.G1080R,TAOK2:NM_001<br>252043:exon17:c.G2899C:p.G96<br>7R                                                                                                      |  |
| 4  | 1070167<br>90 | 1070167<br>90 | C | G | exonic | TBCK     | 1 | nonsynonymous SNV | TBCK:NM_033115:exon23:c.G22<br>31C:p.R744P,TBCK:NM_001163<br>435:exon25:c.G2420C:p.R807P,T<br>BCK:NM_001163436:exon25:c.G<br>2420C:p.R807P,TBCK:NM_0011<br>63437:exon25:c.G2303C:p.R768<br>P         |  |
| 14 | 9043756<br>8  | 9043756<br>8  | C | T | exonic | TDP1     | 1 | nonsynonymous SNV | TDP1:NM_001008744:exon5:c.C<br>709T:p.H237Y,TDP1:NM_018319<br>:exon6:c.C709T:p.H237Y                                                                                                                 |  |

|    |               |               |   |   |        |                 |   |                   |                                                                                                                                                                                                                                                  |  |
|----|---------------|---------------|---|---|--------|-----------------|---|-------------------|--------------------------------------------------------------------------------------------------------------------------------------------------------------------------------------------------------------------------------------------------|--|
| 9  | 1030708<br>06 | 1030708<br>06 | C | T | exonic | <i>TEX10</i>    | 1 | nonsynonymous SNV | TEX10:NM_001161584:exon13:c.<br>G2450A:p.G817E,TEX10:NM_01<br>7746:exon13:c.G2441A:p.G814E                                                                                                                                                       |  |
| 17 | 3296487<br>1  | 3296487<br>1  | G | A | exonic | <i>TMEM132E</i> | 1 | nonsynonymous SNV | TMEM132E:NM_207313:exon10:<br>c.G2575A:p.E859K                                                                                                                                                                                                   |  |
| 19 | 1679327<br>4  | 1679327<br>4  | G | A | exonic | <i>TMEM38A</i>  | 1 | nonsynonymous SNV | TMEM38A:NM_024074:exon4:c.<br>G509A:p.R170Q                                                                                                                                                                                                      |  |
| 1  | 1149477       | 1149477       | C | T | exonic | <i>TNFRSF4</i>  | 1 | nonsynonymous SNV | TNFRSF4:NM_003327:exon1:c.G<br>31A:p.G11R                                                                                                                                                                                                        |  |
| 6  | 1677537<br>08 | 1677537<br>08 | G | T | exonic | <i>TTLL2</i>    | 1 | nonsynonymous SNV | TTLL2:NM_031949:exon3:c.G320<br>T:p.G107V                                                                                                                                                                                                        |  |
| 2  | 1794285<br>20 | 1794285<br>20 | C | T | exonic | <i>TTN</i>      | 1 | nonsynonymous SNV | TTN:NM_003319:exon154:c.G55<br>144A:p.V18382M,TTN:NM_13343<br>2:exon155:c.G55519A:p.V18507<br>M,TTN:NM_133437:exon155:c.G<br>55720A:p.V18574M,TTN:NM_133<br>378:exon275:c.G74635A:p.V2487<br>9M,TTN:NM_001256850:exon276<br>:c.G77416A:p.V25806M |  |
| 19 | 3494297<br>3  | 3494297<br>3  | G | A | exonic | <i>UBA2</i>     | 1 | nonsynonymous SNV | UBA2:NM_005499:exon10:c.G95<br>9A:p.R320H                                                                                                                                                                                                        |  |
| 1  | 2297727<br>58 | 2297727<br>58 | C | G | exonic | <i>URB2</i>     | 1 | nonsynonymous SNV | URB2:NM_014777:exon4:c.C239<br>8G:p.L800V                                                                                                                                                                                                        |  |
| 4  | 8560010<br>4  | 8560010<br>4  | A | G | exonic | <i>WDFY3</i>    | 1 | nonsynonymous SNV | WDFY3:NM_014991:exon65:c.T1<br>0115C:p.I3372T                                                                                                                                                                                                    |  |
| 7  | 1586944<br>46 | 1586944<br>46 | A | G | exonic | <i>WDR60</i>    | 1 | nonsynonymous SNV | WDR60:NM_018051:exon9:c.A10<br>76G:p.E359G                                                                                                                                                                                                       |  |
| 8  | 1075562<br>3  | 1075562<br>3  | T | C | exonic | <i>XKR6</i>     | 1 | nonsynonymous SNV | XKR6:NM_173683:exon3:c.A176<br>5G:p.M589V                                                                                                                                                                                                        |  |
| 6  | 4349662<br>2  | 4349662<br>2  | G | A | exonic | <i>XPO5</i>     | 1 | nonsynonymous SNV | XPO5:NM_020750:exon24:c.C27<br>19T:p.H907Y                                                                                                                                                                                                       |  |
| 16 | 1186818<br>7  | 1186818<br>7  | T | C | exonic | <i>ZC3H7A</i>   | 1 | nonsynonymous SNV | ZC3H7A:NM_014153:exon9:c.A8<br>08G:p.M270V                                                                                                                                                                                                       |  |
| 19 | 4468169<br>3  | 4468169<br>3  | T | A | exonic | <i>ZNF226</i>   | 1 | nonsynonymous SNV | ZNF226:NM_001032372:exon6:c.<br>T2278A:p.C760S,ZNF226:NM_00<br>1032373:exon6:c.T2278A:p.C760<br>S                                                                                                                                                |  |
| 7  | 6438923<br>5  | 6438923<br>5  | G | A | exonic | <i>ZNF273</i>   | 1 | nonsynonymous SNV | ZNF273:NM_021148:exon4:c.G1<br>529A:p.G510E                                                                                                                                                                                                      |  |

|    |               |               |   |   |        |                |   |                   |                                                                                                                               |  |
|----|---------------|---------------|---|---|--------|----------------|---|-------------------|-------------------------------------------------------------------------------------------------------------------------------|--|
| 12 | 5476443<br>2  | 5476443<br>2  | G | T | exonic | <i>ZNF385A</i> | 1 | nonsynonymous SNV | ZNF385A:NM_001130968:exon6:c.C665A:p.S222Y,ZNF385A:NM_015481:exon6:c.C848A:p.S283Y,ZNF385A:NM_001130967:exon7:c.C908A:p.S303Y |  |
| 16 | 3434804       | 3434804       | G | C | exonic | <i>ZNF434</i>  | 1 | nonsynonymous SNV | ZNF434:NM_017810:exon5:c.C253G:p.Q85E                                                                                         |  |
| 19 | 5899169<br>9  | 5899169<br>9  | C | T | exonic | <i>ZNF446</i>  | 1 | nonsynonymous SNV | ZNF446:NM_017908:exon7:c.C959T:p.T320M                                                                                        |  |
| 19 | 5790997<br>5  | 5790997<br>5  | C | T | exonic | <i>ZNF548</i>  | 1 | nonsynonymous SNV | ZNF548:NM_152909:exon3:c.C320T:p.P107L,ZNF548:NM_001172773:exon4:c.C356T:p.P119L                                              |  |
| 12 | 1336335<br>70 | 1336335<br>70 | G | T | exonic | <i>ZNF84</i>   | 1 | nonsynonymous SNV | ZNF84:NM_001127372:exon5:c.G269T:p.W90L,ZNF84:NM_003428:exon5:c.G269T:p.W90L                                                  |  |
| 8  | 1054634<br>84 | 1054634<br>84 | C | T | exonic | <i>DPYS</i>    | 1 | stopgain SNV      | DPYS:NM_001385:exon2:c.G413A:p.W138X                                                                                          |  |
| 1  | 1112971<br>2  | 1112971<br>2  | G | A | exonic | <i>EXOSC10</i> | 1 | stopgain SNV      | EXOSC10:NM_002685:exon21:c.C2317T:p.R773X,EXOSC10:NM_001001998:exon22:c.C2392T:p.R798X                                        |  |
| 17 | 3988402<br>8  | 3988402<br>8  | G | A | exonic | <i>HAP1</i>    | 1 | stopgain SNV      | HAP1:NM_177977:exon8:c.C1261T:p.Q421X                                                                                         |  |
| 22 | 2513182<br>0  | 2513182<br>0  | T | A | exonic | <i>PIWIL3</i>  | 1 | stopgain SNV      | PIWIL3:NM_001008496:exon13:c.A1489T:p.R497X,PIWIL3:NM_001255975:exon13:c.A1489T:p.R497X                                       |  |

**Supplementary Figure S1. Occurrence of novel SNVs (A) and novel InDels (B).** The X-axis graphs the number of cases. The Y-axis displays the chromosomes.

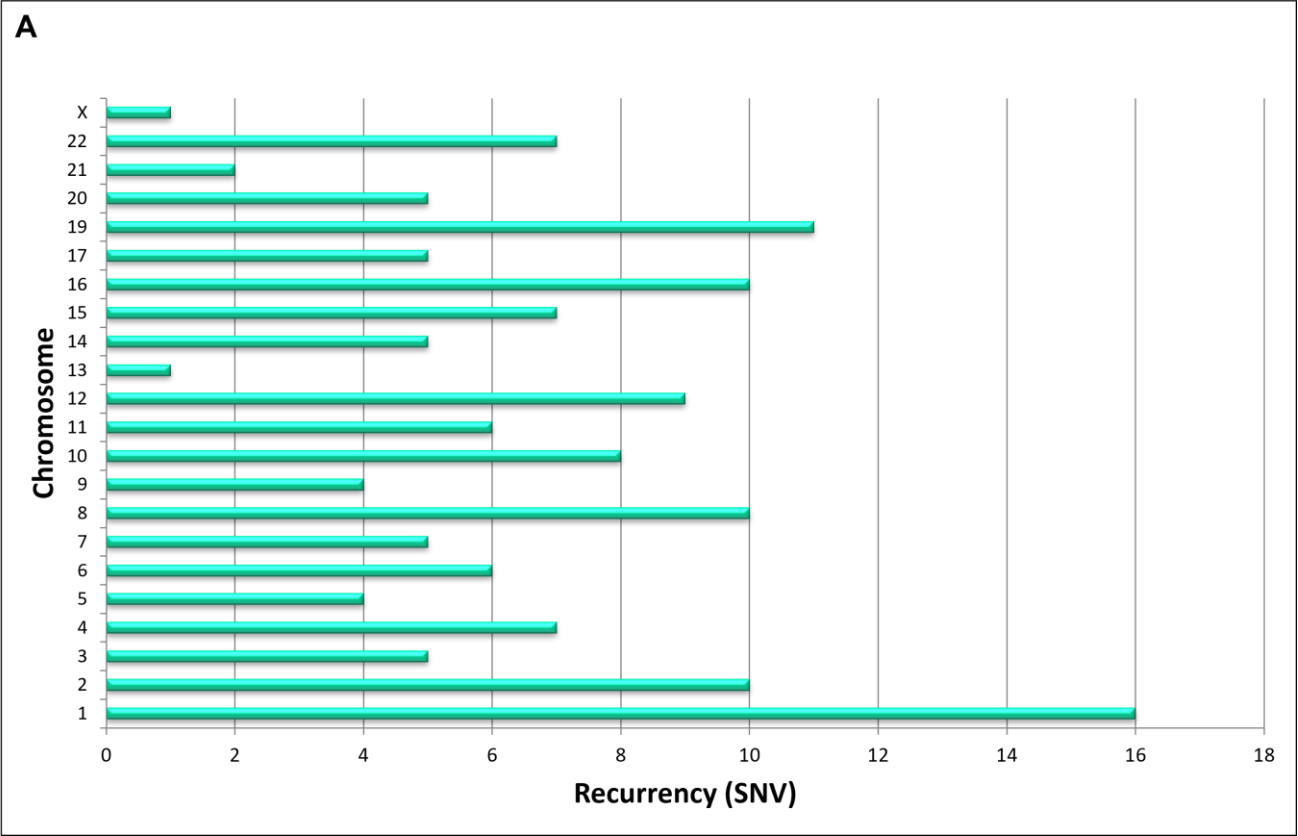

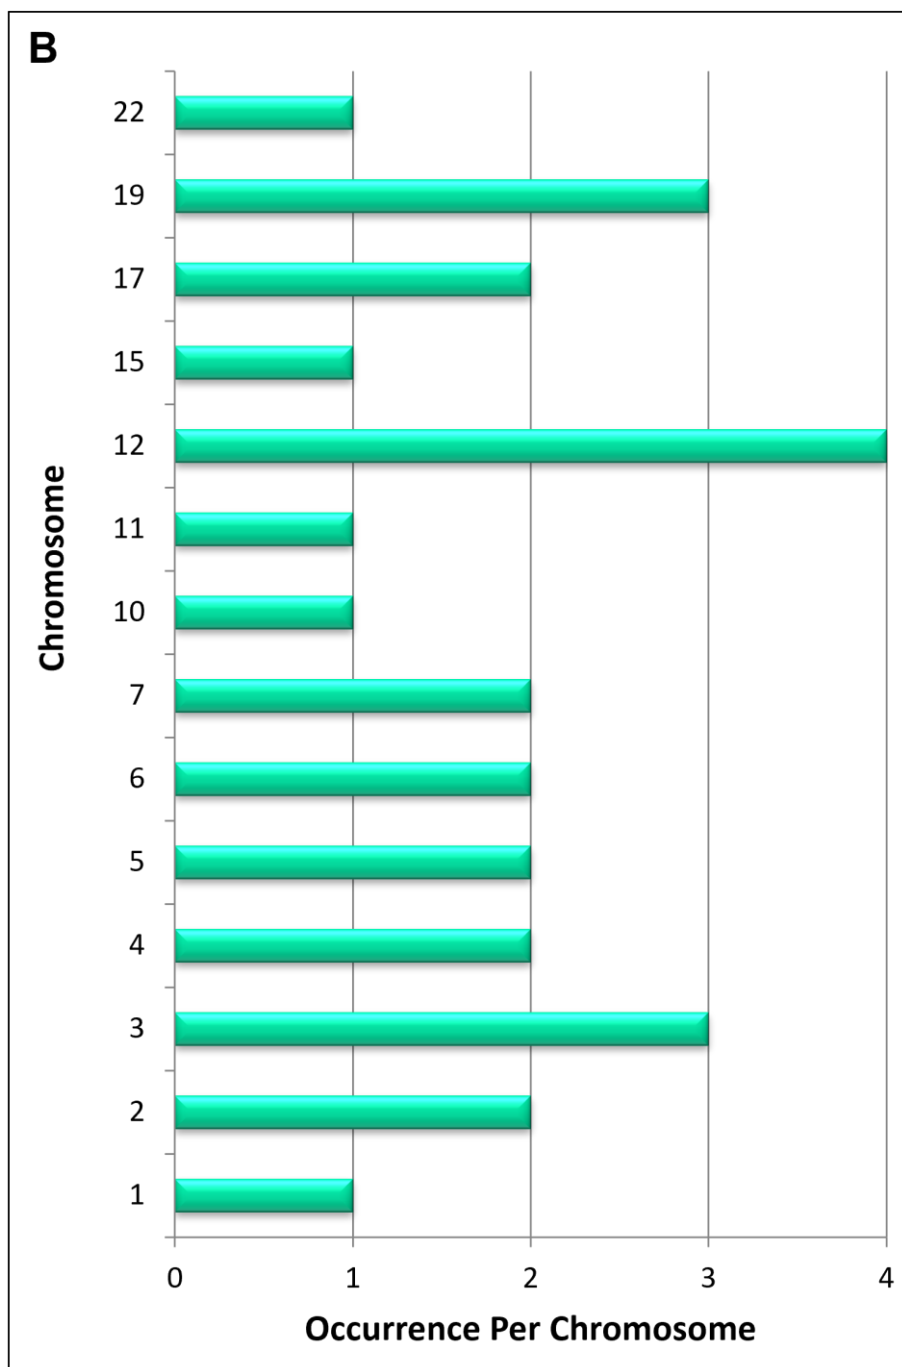

**Supplementary Figure S2. Functional analysis of genes affected by SNVs.** The affected genes were analyzed in terms of enrichment of Gene Ontology Biological Processes (A). Pathways analysis aimed to recognize actionable genes was performed by Cognoscente (B).

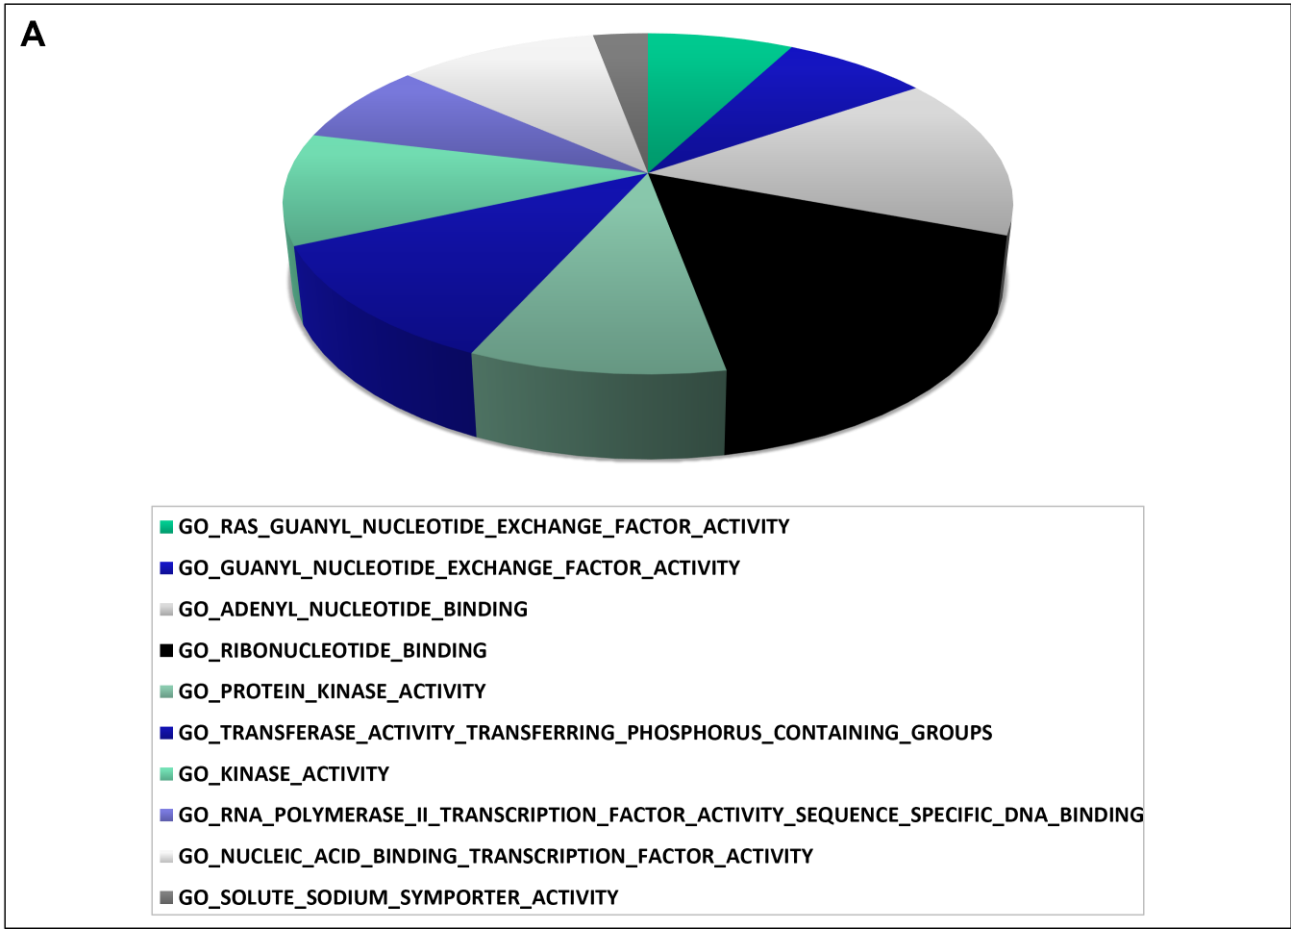

B

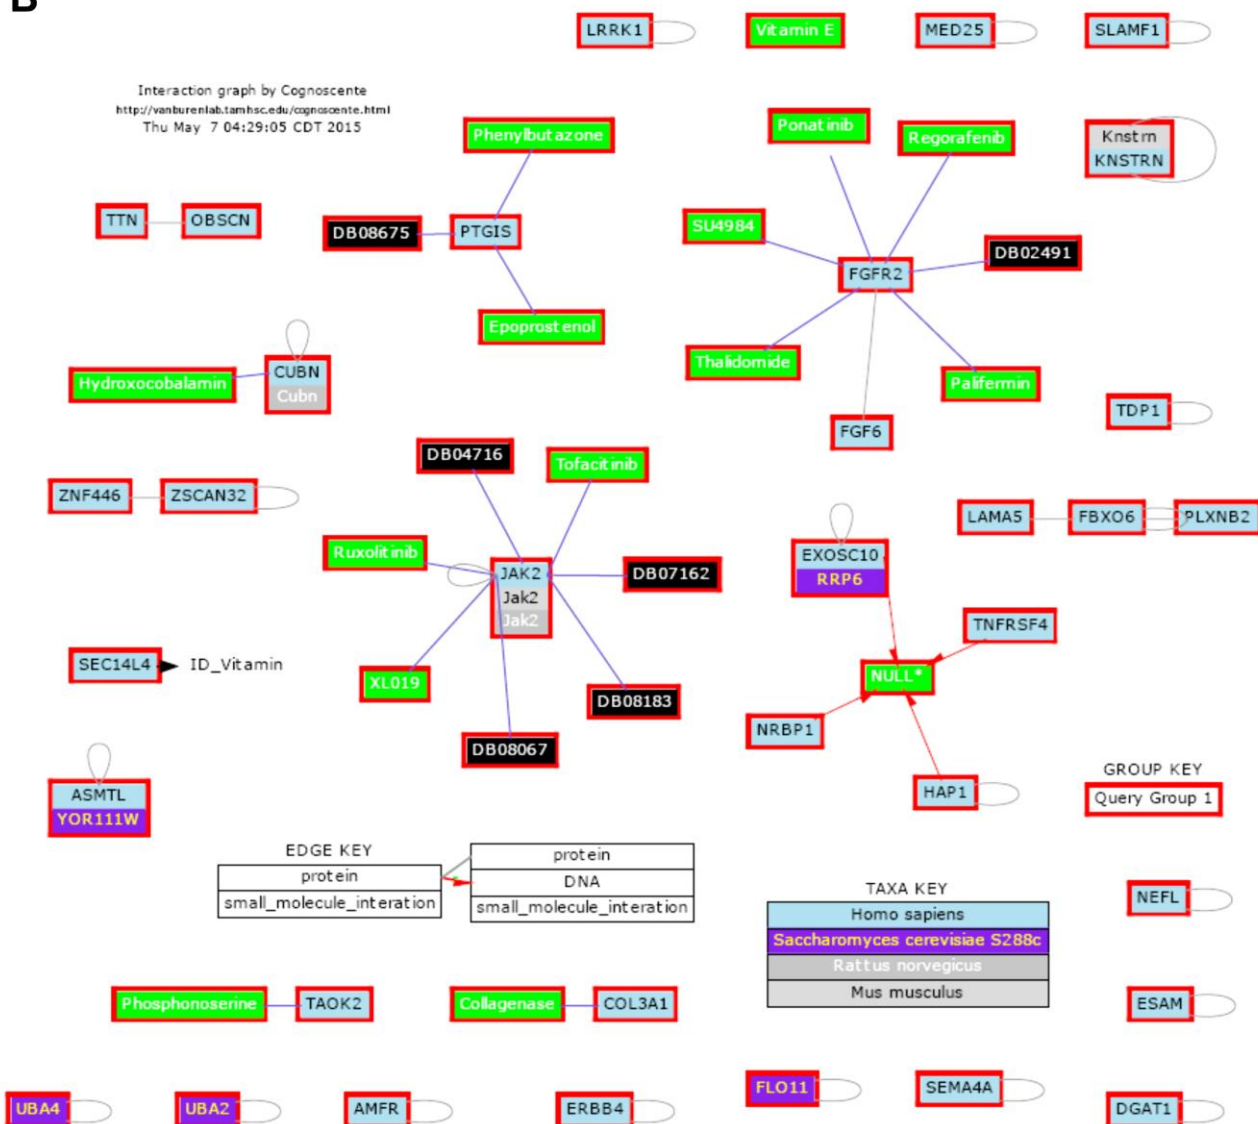

Supplement: s1 [file s1]
